# Supplementary material
Source: publisher figshare collection journal article supplement (https://acs.figshare.com/ndownloader/files/5722284)

**Supporting Information for Journal of the American Chemical Society article:**  
*"Cyclic Transmembrane Charge Transport Mediated by Perylium and Thiopyrylium Ions"*, Rafail F. Khairutdinov and James K. Hurst, Department of Chemistry, Washington State University, Pullman, WA, USA 99164-4630

**Derivation of Kinetic Equations for Transmembrane Diffusion of Neutral Perylium Radicals.** All experiments reported were made under conditions where on average less than 0.6 TPP<sup>o</sup> or TPTP<sup>o</sup> radicals per vesicle were generated by the laser pulse. Under these conditions, the rate equations describing the radical decay are:

$$d[\text{Pyr}^o]_e / dt = -\tau_o^{-1}[\text{Pyr}^o]_e + \tau^{-1}(-[\text{Pyr}^o]_e + [\text{Pyr}^o]_i) \quad (\text{S1})$$

$$d[\text{Pyr}^o]_i / dt = -(nk_q + \tau_o^{-1})[\text{Pyr}^o]_i + \tau^{-1}(-[\text{Pyr}^o]_i + [\text{Pyr}^o]_e) \quad (\text{S2})$$

where the concentration subscripts *i* and *e* refer to the intravesicular and extravesicular location of the radicals,  $\tau_o$  is the characteristic time for decay of Pyr<sup>o</sup> in the absence of Co(bpy)<sub>3</sub><sup>3+</sup>,  $\tau$  is the characteristic time for transmembrane diffusion of Pyr<sup>o</sup>,  $k_q$  is the rate constant of (Pyr<sup>o</sup>)<sub>i</sub> oxidation by Co(bpy)<sub>3</sub><sup>3+</sup> and *n* is the number of Co(bpy)<sub>3</sub><sup>3+</sup> ions located within a particular vesicle. Equations S1 and S2 can be solved analytically to give for the total (intravesicular and extravesicular) concentration of Pyr<sup>o</sup>:

$$\frac{[\text{Pyr}^o](t)}{[\text{Pyr}^o](0)} = F(t, \tau_o, \tau, nk_q) \equiv A_1(\tau_o, \tau, nk_q)e^{-\lambda_1 t} + A_2(\tau_o, \tau, nk_q)e^{-\lambda_2 t} \quad (\text{S3})$$

where  $A_1(\tau_o, \tau, nk_q)$  and  $A_2(\tau_o, \tau, nk_q)$  are constants and

$$\lambda_{1,2} = \frac{-(2/\tau_o + 2/\tau + nk_q) \pm \sqrt{4/\tau^2 + n^2 k_q^2}}{2} \quad \text{Recognizing that the number of Co(bpy)}_3^{3+}$$

within the population of vesicles follows the Poisson distribution, one obtains:

$$\frac{[\text{Pyr}^o](t)}{[\text{Pyr}^o](0)} = \sum_{n=0}^{\infty} \frac{m^n}{n!} \exp(-m) F(t, \tau_o, \tau, nk_q) \quad (\text{S4})$$

where  $m = [\text{Co(bpy)}_3^{3+}]/[\text{ves}]$  is the average number of Co(bpy)<sub>3</sub><sup>3+</sup> ions per vesicle. The characteristic decay time is the first moment of the decay kinetics, so we have:

$$\tau' = \frac{\int_0^{\infty} [\text{Pyr}^o](t) dt}{\int_0^{\infty} [\text{Pyr}^o](0) dt} = \sum_{n=0}^{\infty} \frac{m^n}{n!} \exp(-m) \int_0^{\infty} F(t, \tau_o, \tau, nk_q) dt \quad (\text{S5})$$

where  $\tau'$  is the experimentally observed characteristic time for Pyr<sup>o</sup> decay.

If  $k_q \gg \tau^{-1}$ ,  $\tau_o^{-1}$ , it follows from Equation S5 that

$$\tau' = \frac{\tau_o}{\tau_o + \tau} (\tau + \tau_o e^{-m}) \quad (\text{S6})$$

and the characteristic decay time changes from  $\tau_0$  in the absence of  $\text{Co(bpy)}_3^{3+}$  to  $\tau_0\tau/(\tau_0+\tau)$  at large  $\text{Co(bpy)}_3^{3+}$  concentrations. When  $\tau_0 \gg \tau$ ,  $\tau' = \tau$ , i.e., the rate of decay equals the rate of transmembrane diffusion of  $\text{Pyr}^0$ .

If  $k_q \ll \tau^{-1}$ ,  $\tau_0^{-1}$  or  $\tau_0^{-1} \ll k_q \ll \tau^{-1}$ , it follows from Equation S6 that  $\tau' = \tau_0$ , so that the characteristic decay time remains unchanged upon addition of  $\text{Co(bpy)}_3^{3+}$ .

Only the first limiting case,  $k_q \gg \tau^{-1}$ , can account for the experimental data (Figure 11). Consequently, the experimental decay time measures the characteristic time for transmembrane diffusion of  $\text{Pyr}^0$ .

**Figure S1.** Kinetics of  $\text{TPTP}^+$  hydrolysis in DHP vesicles. Reactions were monitored by changes in absorption at 400 nm in 40 mM acetate buffer, pH 11. Conditions:  $[\text{TPTP}^+]/[\text{vesicle}] = 160$  (1) and  $[\text{TPTP}^+]/[\text{vesicle}] = 30$  (2). Solid lines are best fits to a sum of two exponents with  $\tau_1 = 13.5$  s and  $\tau_2 = 353$  s (1) and to a single-exponential rate law with  $\tau = 13.5$  s (2).

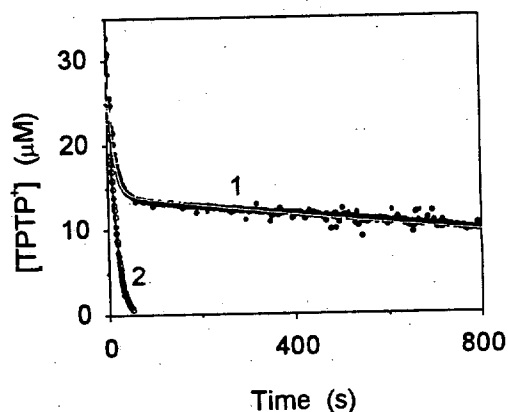

**Figure S2.** Emission spectra of  $\text{TPTP}^+$ . Conditions: in 40 mM acetate buffer, pH 5.0 (1), and bound to DHP vesicles at  $[\text{TPTP}^+]/[\text{vesicle}] = 30$  (2) and  $[\text{TPTP}^+]/[\text{vesicle}] = 160$  (3);  $\lambda_{\text{ex}} = 400$  nm.

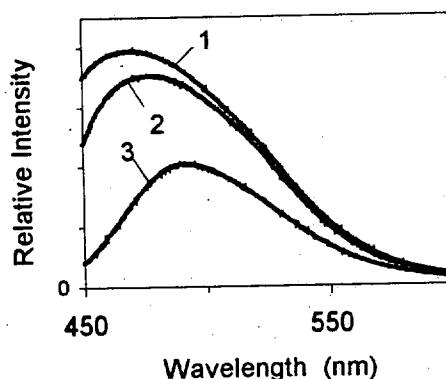

Supplement: Supplementary file 1 [file 5722284]
